# Supplementary material for: Identification and Characterization of Jasmonic Acid Methyltransferase Involved in the Formation of Floral Methyl Jasmonate in Hedychium coronarium
Source: MDPI journal article supplement (doi:10.3390/plants13010008), 2023-12-19
Supplement: s1 [file s1]

## Supplementary Materials

**Table S1.** Primers for gene clone, bacterial expression and real-time PCR of *HcJMT1*.

| Purpose              | Forward/reverse primer sequence (5'-3')               |
|----------------------|-------------------------------------------------------|
| Gene clone           | ATGGATCTCAAGAAATATTTTCAC                              |
|                      | TCACTTCCTCACCAGAGCAAT                                 |
| Bacterial expression | <i>SalI</i> - <u>GTCGACCGATGGATCTCAAGAAATATTTTCAC</u> |
|                      | <i>NotI</i> - <u>GCGGCCGCTCACTTCCTCACCAGAGCAATC</u>   |
| Real-time PCR        | TACGCCAGCAACTCTAAGAT                                  |
|                      | AAATCCGCAACGCTCATCGT                                  |
